# Supplementary figures and images for: Metabolite Dysregulation by Pranlukast in Mycobacterium tuberculosis
Source: MDPI journal article supplement (doi:10.3390/molecules27051520), 2022-02-24

# Figure S1

**A**

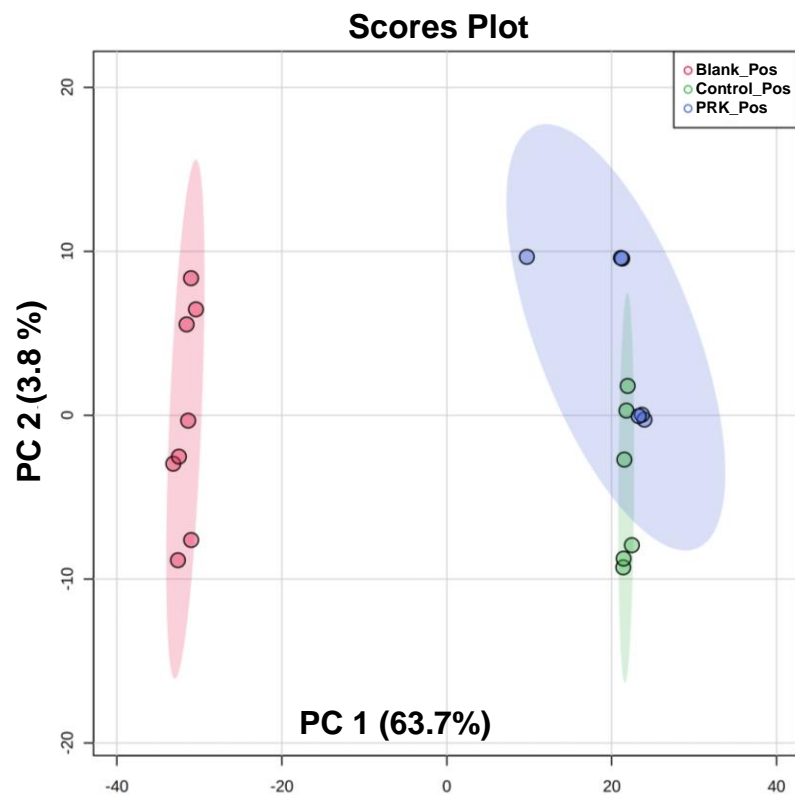

**C**

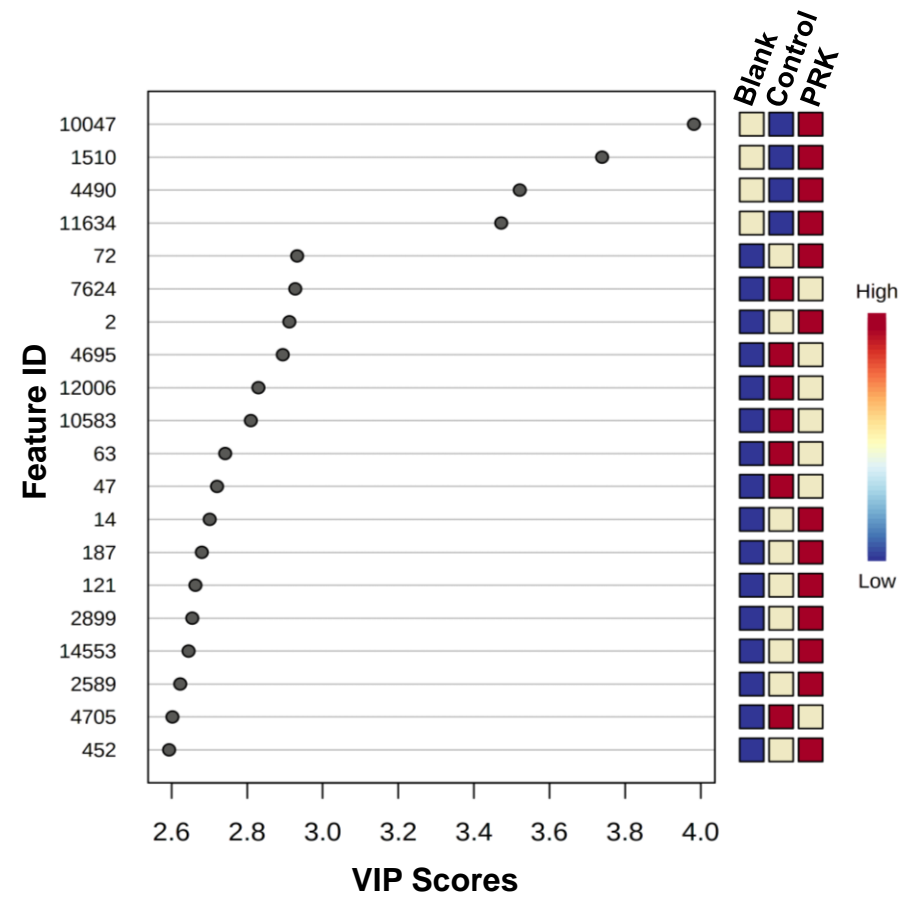

**B**

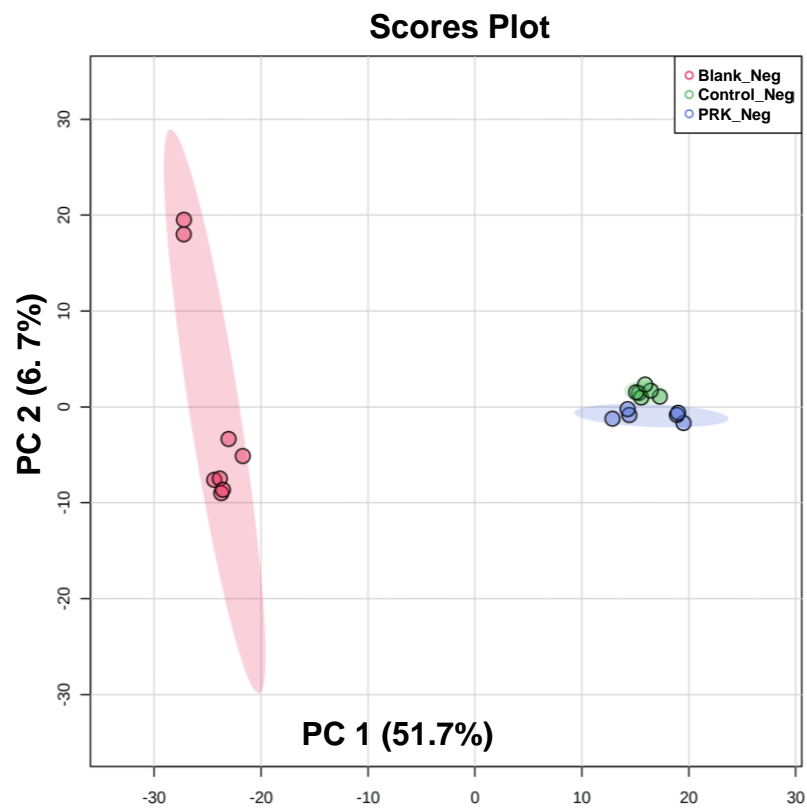

**D**

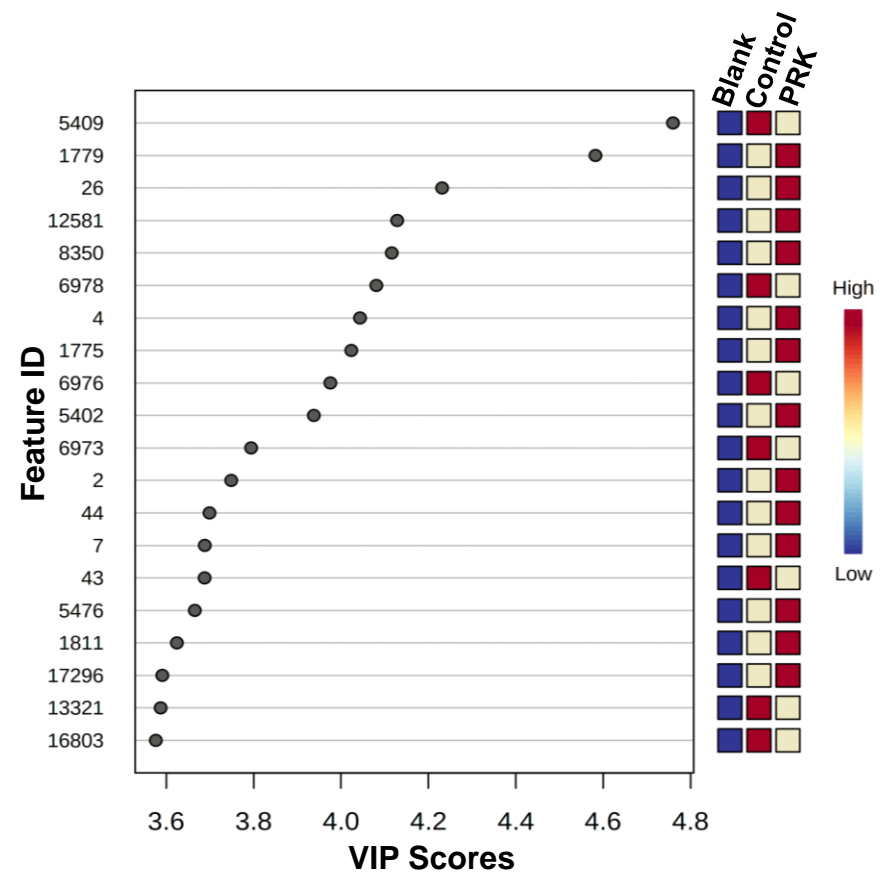

Supplement: s1 [file s1]
